# Supplementary material for: Elevated expression of eukaryotic translation initiation factor 3H is associated with proliferation, invasion and tumorigenicity in human hepatocellular carcinoma
Source: PubMed Central journal article supplement (PMC5226555; doi:10.18632/oncotarget.10222), 2016-06-22
Supplement: oncotarget-07-49888-s001.pdf [file oncotarget-07-49888-s001.pdf]

## Elevated expression of eukaryotic translation initiation factor 3H is associated with proliferation, invasion and tumorigenicity in human hepatocellular carcinoma

### SUPPLEMENTARY TABLES

Supplementary Table S1: Sequences of primers and siRNA used

| Genes        |                   | Sequence             |
|--------------|-------------------|----------------------|
| EIF3H        | Sense primer      | GTGCTTTTGGGTCTGGTTGT |
|              | Anti-sense primer | AGCCACGTGAAGATGATCA  |
| GAPDH        | Sense primer      | GCACCGTCAAGGCTGAGAAC |
|              | Anti-sense primer | TGGTGAAGACGCCAGTGGA  |
| EIF3H-siRNAs | SiRNA-1           | GCAAGTGCAGATAGATGGC  |
|              | SiRNA-2           | GTGCAGATAGATGGCCTTG  |
|              | SiRNA-3           | GAAGAAGGACAAGGAACTG  |

Supplementary Table S2: Univariate analysis of clinical outcomes of 215 HCC patients

| Variable                              | RFS (%)*       | P value | OS (%)*        | P value |
|---------------------------------------|----------------|---------|----------------|---------|
| Age: >53/<53                          | 51.8/49.2      | 0.721   | 77.8/69.9      | 0.268   |
| Gender: male/female                   | 46.4/68.4      | 0.021   | 70.6/82.7      | 0.221   |
| HBs antigen: +/-                      | 51.5/45.6      | 0.325   | 76.9/66.6      | 0.109   |
| Liver cirrhosis: +/-                  | 52.1/49.6      | 0.732   | 72.5/77.8      | 0.589   |
| Serum albumin (g/L):<br>>40/≤40       | 51.5/48.6      | 0.627   | 71.0/75.2      | 0.616   |
| Serum bilirubin<br>(μmol/L): >17/≤17  | 53.7/45.7      | 0.063   | 70.1/75.0      | 0.320   |
| HBe antigen: +/-                      | 34.0/66.0      | 0.000   | 59.2/89.1      | 0.000   |
| Tumor size (cm):<br>>5/≤5             | 53.5/43.6      | 0.236   | 76.0/62.1      | 0.065   |
| Number of tumor:<br>Solitary/Multiple | 61.2/44.5      | 0.015   | 82.5/69.5      | 0.024   |
| Edmondson Grade:<br>I+II/III          | 25.4/59.9      | 0.000   | 49.7/83.5      | 0.000   |
| Micro-vascular<br>Invasion: +/-       | 16.3/54.8      | 0.000   | 49.6/76.0      | 0.024   |
| Satellite                             | 30.3/61.5      | 0.000   | 62.9/81.7      | 0.002   |
| Encapsulation:<br>complete/-          | 41.5/59.7      | 0.005   | 65.5/83.9      | 0.001   |
| TNM stage: I/II/III                   | 64.5/52.3/17.4 | 0.000   | 85.8/57.0/46.3 | 0.000   |
| BCLC stage: A/B/C                     | 57.6/35.1/16.4 | 0.000   | 78.5/61.0/50.1 | 0.001   |
| ALT (U/L): >40/≤40                    | 48.5/52.6      | 0.539   | 71.0/74.9      | 0.644   |
| AFP (μg/L): >20/≤20                   | 42.1/68.7      | 0.001   | 70.2/83.9      | 0.023   |
| EIF3H                                 | 61.5/40.2      | 0.000   | 79.9/66.0      | 0.005   |

RFS: Recurrence-Free Survival; OS: Overall Survival; \*the time follow-up ended is used to calculate the Recurrence-Free Survival and Overall survival; p value by Long-rank test less than 0.05 was considered statistical significant.

Supplementary Table S3: Multivariate analysis for factors related to HCC RFS

| Variable                                | Univariate |               |         | Multivariate |             |         |
|-----------------------------------------|------------|---------------|---------|--------------|-------------|---------|
|                                         | HR         | 95% CI        | P value | HR           | 95% CI      | P value |
| Age(year) >53/ ≤53                      | 1.002      | 0.991-1.012   | 0.737   |              |             |         |
| Gender: male/femal                      | 1.214      | 1.048-2.635   | 0.018   | 1.199        | 0.808-1.781 | 0.397   |
| HBsAg: positive/negative                | 1.339      | 0.941-1.905   | 0.138   |              |             |         |
| HBeAg: positive/negative                | 1.196      | 0.906-1.580   | 0.186   |              |             |         |
| Liver cirrhosis: +/-                    | 1.263      | 0.956-1.670   | 0.098   |              |             |         |
| Antiviral therapy                       | 1.290      | 0.932-1.784   | 0.122   |              |             |         |
| TBL(μmol/L): >17 / ≤17                  | 0.989      | 0.961-1.019   | 0.476   |              |             |         |
| ALB (g/dL):>40 / ≤40                    | 0.982      | 0.942-1.023   | 0.386   |              |             |         |
| ALT (U/L): >40 / ≤40                    | 1.001      | 0.997-1.006   | 0.477   |              |             |         |
| TNM stage: I/ II/ III                   | 1.612      | 1.296-3.148   | 0.006   | 1.012        | 0.986-1.023 | 0.446   |
| Number of tumor:<br>Solitary / Multiple | 1.056      | 0.934-1.136   | 0.423   |              |             |         |
| BCLC stage: A/B/C                       | 1.764      | 1.372-3.721   | 0.004   | 0.946        | 0.649-1.381 | 0.780   |
| Edmondson-Steiner<br>grade: I + II/III  | 1.573      | 1.282-3.521   | 0.015   | 1.088        | 0.827-1.430 | 0.548   |
| Tumour<br>encapsulation:No/<br>Complete | 1.832      | 1.346-2.567   | 0.031   | 1.122        | 0.843-1.493 | 0.435   |
| Micro-<br>vascularinvasion(+/-)         | 1.593      | 1.392-2.764   | 0.012   | 1.290        | 0.932-1.784 | 0.122   |
| Macro-<br>vascularinvasion(+/-)         | 1.843      | 1.251-2.682   | 0.037   | 1.339        | 0.941-1.905 | 0.138   |
| EIF3H                                   | 1.411      | 1.064-1.871   | 0.017   | 1.979        | 1.297-2.996 | <0.001  |
| AFP(≤20ug/L vs >20ug)                   | 1.634      | 1.120-2.385   | 0.011   | 1.841        | 1.062-3.167 | 0.0260  |
| Tumor size (≤5 cm vs>5<br>cm)           | 1.957      | 1.444-2.654   | <0.001  | 2.539        | 1.520-4.256 | <0.001  |
| Satellite (presence vs<br>absence)      | 2.2820     | 1.7111-3.0435 | <0.001  | 2.358        | 1.460-3.702 | 0.0020  |

HCC: Hepatocellular carcinoma; HR: Hazard ratio; CI: Confidence interval; TBL: Total bilirubin; ALB: Albumin; ALT: Alanine aminotransferase; PT: Prothrombin time; PLT: Blood platelet; AFP: Alpha-fetoprotein.

Supplementary Table S4: Multivariate analysis for factors related with HCC OS

| Variable                                 | Univariate |             |         | Multivariate |             |         |
|------------------------------------------|------------|-------------|---------|--------------|-------------|---------|
|                                          | HR         | 95%CI       | P value | HR           | 95%CI       | P value |
| Age(year) >53/ ≤53                       | 1.023      | 0.891-1.412 | 0.268   |              |             |         |
| Gender: male/femal                       | 1.241      | 1.108-1.842 | 0.021   | 1.024        | 0.732-1.204 | 0.371   |
| HBsAg: positive/negative                 | 1.134      | 0.654-1.487 | 0.109   |              |             |         |
| HBeAg: positive/negative                 | 1.785      | 0.896-4.382 | 0.081   |              |             |         |
| Liver cirrhosis: +/-                     | 1.084      | 0.695-1.423 | 0.589   |              |             |         |
| Antiviral therapy                        | 1.082      | 0.341-1.396 | 0.267   |              |             |         |
| TBL(μmol/L): >17/ ≤17                    | 0.765      | 0.201-1.138 | 0.320   |              |             |         |
| ALB (g/dL):>40/ ≤40                      | 0.934      | 0.672-1.104 | 0.784   |              |             |         |
| ALT (U/L): >40/ ≤40                      | 1.003      | 0.984-1.014 | 0.841   |              |             |         |
| TNM stage: I/II/III                      | 2.434      | 1.783-3.627 | 0.001   | 1.145        | 0.863-1.616 | 0.061   |
| Number of tumor: Solitary/<br>Multiple   | 1.172      | 0.734-2.354 | 0.074   |              |             |         |
| BCLC stage: A/B/C                        | 2.821      | 1.452-3.783 | 0.001   | 1.106        | 0.721-1.854 | 0.104   |
| Edmondson-Steiner grade: I<br>+ II / III | 2.153      | 1.637-4.526 | 0.001   | 1.004        | 0.632-1.657 | 0.568   |
| Tumour encapsulation:No/<br>Complete     | 2.145      | 1.738-3.728 | 0.001   | 1.013        | 0.832-1.751 | 0.168   |
| Micro-vascularinvasion(+/-)              | 1.379      | 1.168-2.872 | 0.024   | 1.109        | 0.768-1.892 | 0.117   |
| Macro-vascularinvasion(+/-)              | 1.572      | 1.265-2.783 | 0.036   | 1.125        | 0.547-2.691 | 0.276   |
| EIF3H                                    | 1.527      | 1.237-2.351 | 0.005   | 1.927        | 1.775-2.582 | 0.002   |
| AFP(≤20ug/Lvs >20ug/L)                   | 1.568      | 1.254-2.249 | 0.023   | 1.035        | 0.836-1.762 | 0.126   |
| Tumor size (≤5 cm vs>5 cm)               | 1.752      | 1.267-2.893 | 0.035   | 2.134        | 1.628-3.458 | 0.001   |
| Satellite (presence vs absence)          | 1.882      | 1.543-2.762 | 0.012   | 1.258        | 0.837-1.453 | 0.076   |

HCC: Hepatocellular carcinoma; HR: Hazard ratio; CI: Confidence interval; TBL: Total bilirubin; ALB: Albumin; ALT: Alanine aminotransferase; PT: Prothrombin time; PLT: Blood platelet; AFP: Alpha-fetoprotein.

Supplementary Table S5: Clinicopathological characteristic of HCC patients included

| Variable                               | Cohort 1 ♦ | Cohort 2 ▲ | Cohort 3 ● |
|----------------------------------------|------------|------------|------------|
| All cases                              | 40         | 215        | 65         |
| Age(year): >53/<53                     | 16/24      | 85/130     | 20/45      |
| Gender: male/female                    | 31/9       | 180/35     | 49/16      |
| HBs antigen: +/-                       | 37/3       | 195/20     | 55/10      |
| Liver cirrhosis: +/-                   | 29/11      | 141/74     | 44/21      |
| Serum albumin (g/L):<br>>40/≤40        | 31/9       | 157/58     | 40/25      |
| Serum bilirubin (μmol/L):<br>>17/≤17   | 10/30      | 57/158     | 15/50      |
| HBe antigen: +/-                       | 16/24      | 70/145     | 16/39      |
| Tumor size (cm): >5/≤5                 | 14/26      | 75/140     | 27/38      |
| Number of tumor: Solitary/<br>Multiple | 32/8       | 171/44     | 55/10      |
| Edmondson Grade: I+II/III              | 7/33       | 68/147     | 25/40      |
| Micro-vascular Invasion: +/-           | 11/29      | 65/150     | 20/45      |
| Macro-vascular Invasion: +/-           | 4/36       | 19/196     | 8/57       |
| Pathological Satellite: +/-            | 15/25      | 88/127     | 28/37      |
| Encapsulation: complete/-              | 25/15      | 120/95     | 36/29      |
| ALT (U/L): >40/≤40                     | 18/22      | 98/117     | 35/30      |
| AFP (μg/L): >20/≤20                    | 35/5       | 159/56     | 40/25      |

Patients of group ▲ were independent from patients of group ♦, and patients of group ● were selected from group ▲ with well-preserved serum.
